# Supplementary material for: Plasma miR-324-3p and miR-1285 as diagnostic and prognostic biomarkers for early stage lung squamous cell carcinoma
Source: PubMed Central journal article supplement (PMC5312339; doi:10.18632/oncotarget.11198), 2016-08-11
Supplement: oncotarget-07-59664-s001.pdf [file oncotarget-07-59664-s001.pdf]

## Plasma miR-324-3p and miR-1285 as diagnostic and prognostic biomarkers for early stage lung squamous cell carcinoma

### Supplementary Materials

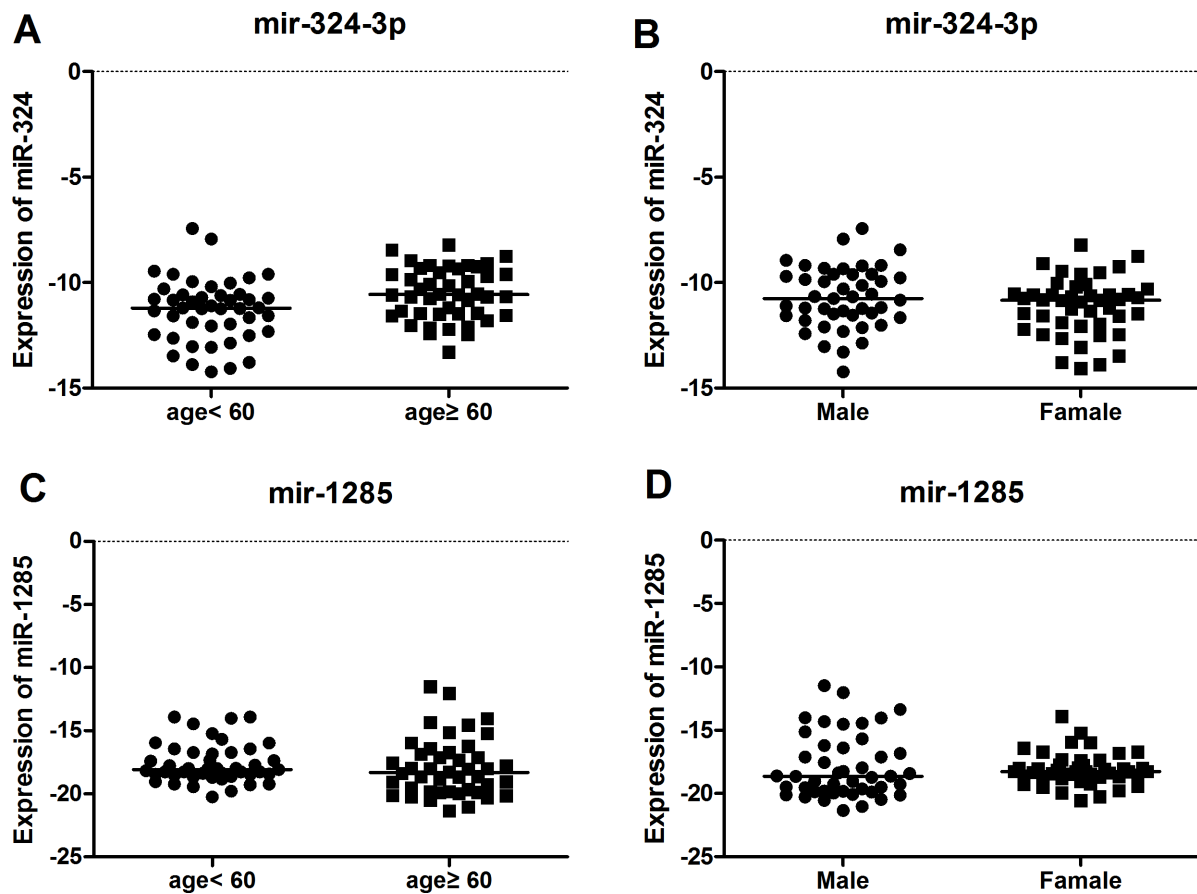

**Supplementary Figure S1: The relationship of plasma miRNAs and clinical parameters.** LSCC patients were stratified by gender and age. (A) plasma miR-324-3p expression between two age groups; (B) plasma miR-324-3p expression between male and female; (C) plasma miR-1285 expression between two age groups; (D) plasma miR-1285 expression between male and female.
